# Supplementary material
Source: Royal Society of Chemistry journal article supplement (doi:10.1039/d5fo05405b)
Supplement: d5fo05405b1.pdf [file d5fo05405b1.pdf]

## SUPPLEMENTARY INFORMATION

**Supplementary Table 1. The standard curve and correlation coefficient of the internal standard in LC-MS/MS**

| Compounds    | Retention time | Equation                    | r       | Quantitative lower limit | Quantitative upper limit |
|--------------|----------------|-----------------------------|---------|--------------------------|--------------------------|
| Troloxerutin | 2.5802         | $y = 0.00462x - 3.18765e-4$ | 0.99171 | 5                        | 1000                     |

**Supplementary Table 2. Primer information for PCR**

| Gene           | Forward (5'-3')        | Reverse (5'-3')         |
|----------------|------------------------|-------------------------|
| IRF6           | TGGAGACCGGGAAGTATCAG   | TCATGGGAACCTCTTTGGTC    |
| IL-1 $\beta$   | GTACATCAGCACCTCACAAAG  | CACAGGCTCTCTTTGAACAG    |
| IL-6           | ACCACTCCCAACAGACCTGTCT | CAGATTGTTTTCTGCAAGTGCAT |
| TLR4           | CTTTGCTTCCTTGGTGTTG    | ATGATTCTCCTCTTCTTCACG   |
| NF- $\kappa$ B | TCTGTTTCCCCTCATCTTT    | TGGTATCTGTGCTTCTCTC     |
| CYP2E1         | GCTGTCAAGGAGGTGCTACT   | CCAGTCACGGAGGATACTTAGG  |
| CYP7A1         | AGGCATTTGGACACAGAAG    | ACAGATTGGAGGTTTTGCAT    |
| AMPK           | GCTGTGGCTCACCCAATTAT   | TGTTGTACAGGCAGCTGAGG    |
| GAPDH          | ATCAACGGCACAGTCAAGG    | GCAGAAGGGGCGGAGATGA     |

**Supplementary Table 3. Analysis of differential accumulated flavonoids in apple flesh between 'XJ4' and 'FJ'**

| Compounds                           | Test material | Mean ± SD(μg/g)  | P-value  | Log <sub>2</sub> FC | VIP      | Type |
|-------------------------------------|---------------|------------------|----------|---------------------|----------|------|
| Phlorizin                           | XJ4           | 137.344±10.1498  | 0.002332 | 2.936124            | 1.022079 | up   |
|                                     | FJ            | 12.1361±10.5153  |          |                     |          |      |
| Quercitrin                          | XJ4           | 117.6824±5.6565  | 0.000804 | 3.241174            | 1.025083 | up   |
|                                     | FJ            | 8.2355±7.1689    |          |                     |          |      |
| Chlorogenic acid                    | XJ4           | 108.1946±10.7077 | 0.004887 | 2.356672            | 1.016598 | up   |
|                                     | FJ            | 14.3232±12.4     |          |                     |          |      |
| Cryptochlorogenic acid              | XJ4           | 108.1946±10.7077 | 0.004887 | 2.356672            | 1.016598 | up   |
|                                     | FJ            | 14.3232±12.4     |          |                     |          |      |
| Reynoutrin                          | XJ4           | 68.9412±0.9139   | 0.000043 | 4.839827            | 1.027188 | up   |
|                                     | FJ            | 1.5991±1.392     |          |                     |          |      |
| Guajaverin                          | XJ4           | 68.9412±0.9139   | 0.000043 | 4.839827            | 1.027188 | up   |
|                                     | FJ            | 1.5991±1.392     |          |                     |          |      |
| Avicularin                          | XJ4           | 35.3221±2.6831   | 0.002003 | 5.450059            | 1.023073 | up   |
|                                     | FJ            | 0.5575±0.4812    |          |                     |          |      |
| Hyperoside                          | XJ4           | 21.1245±2.5598   | 0.005130 | 5.165810            | 1.017650 | up   |
|                                     | FJ            | 0.3782±0.3232    |          |                     |          |      |
| Isorhamnetin 3-O-glucoside          | XJ4           | 12.2575±1        | 0.002282 | 5.971067            | 1.022763 | up   |
|                                     | FJ            | 0.1309±0.1116    |          |                     |          |      |
| Tamarixin                           | XJ4           | 12.2575±1        | 0.002282 | 5.971067            | 1.022763 | up   |
|                                     | FJ            | 0.1309±0.1116    |          |                     |          |      |
| Cacticin                            | XJ4           | 12.2575±1        | 0.002282 | 5.971067            | 1.022763 | up   |
|                                     | FJ            | 0.1309±0.1116    |          |                     |          |      |
| Caftaric acid                       | XJ4           | 6.0657±0.156     | 0.000063 | 2.137927            | 1.026193 | up   |
|                                     | FJ            | 0.9167±0.7962    |          |                     |          |      |
| Protocatechuic acid                 | XJ4           | 4.0614±0.0878    | 0.000159 | 4.547501            | 1.027041 | up   |
|                                     | FJ            | 0.116±0.1005     |          |                     |          |      |
| Astragalin                          | XJ4           | 4.0196±0.0765    | 0.000055 | 3.209692            | 1.027073 | up   |
|                                     | FJ            | 0.2977±0.2577    |          |                     |          |      |
| Luteolin-4'-O-glucoside             | XJ4           | 4.0196±0.0765    | 0.000055 | 3.209692            | 1.027073 | up   |
|                                     | FJ            | 0.2977±0.2577    |          |                     |          |      |
| kaempferol 7-O-glucoside            | XJ4           | 4.0196±0.0765    | 0.000055 | 3.209692            | 1.027073 | up   |
|                                     | FJ            | 0.2977±0.2577    |          |                     |          |      |
| Hesperetin 5-O-glucoside            | XJ4           | 3.7527±0.0565    | 0.000001 | 4.000174            | 1.027092 | up   |
|                                     | FJ            | 0.1439±0.1247    |          |                     |          |      |
| trans-Piceid                        | XJ4           | 2.604±0.1588     | 0.000787 | 3.235266            | 1.024429 | up   |
|                                     | FJ            | 0.1985±0.173     |          |                     |          |      |
| Cynaroside                          | XJ4           | 1.6989±0.0198    | 0.000000 | 2.502108            | 1.026934 | up   |
|                                     | FJ            | 0.1973±0.1718    |          |                     |          |      |
| Ononin                              | XJ4           | 1.348±0.0556     | 0.000594 | 5.369836            | 1.026316 | up   |
|                                     | FJ            | 0.0217±0.0183    |          |                     |          |      |
| 4-Hydroxycinnamic acid              | XJ4           | 1.1865±0.0918    | 0.004665 | 1.175923            | 1.014343 | up   |
|                                     | FJ            | 0.352±0.3015     |          |                     |          |      |
| Diosmetol 7-glucoside               | XJ4           | 0.9406±0.0802    | 0.003261 | 2.553362            | 1.020671 | up   |
|                                     | FJ            | 0.105±0.0881     |          |                     |          |      |
| Thermopsoside                       | XJ4           | 0.9406±0.0802    | 0.003261 | 2.553362            | 1.020671 | up   |
|                                     | FJ            | 0.105±0.0881     |          |                     |          |      |
| carlinoside                         | XJ4           | 0.7482±0.0555    | 0.004680 | -1.384529           | 1.011313 | down |
|                                     | FJ            | 1.2473±1.0821    |          |                     |          |      |
| Caffeic acid                        | XJ4           | 0.6783±0.052     | 0.001732 | 3.729345            | 1.022754 | up   |
|                                     | FJ            | 0.0329±0.0282    |          |                     |          |      |
| 3,4-Dihydroxybenzaldehyde           | XJ4           | 0.6014±0.0215    | 0.000061 | 1.445900            | 1.020902 | up   |
|                                     | FJ            | 0.1519±0.1337    |          |                     |          |      |
| Afzelin                             | XJ4           | 0.4975±0.0254    | 0.000416 | 2.377352            | 1.023655 | up   |
|                                     | FJ            | 0.065±0.0566     |          |                     |          |      |
| Coniferaldehyde                     | XJ4           | 0.3772±0.0378    | 0.003466 | 4.334086            | 1.020062 | up   |
|                                     | FJ            | 0.0126±0.0081    |          |                     |          |      |
| Astilbin                            | XJ4           | 0.3228±0.0113    | 0.000401 | 2.858654            | 1.025909 | up   |
|                                     | FJ            | 0.0292±0.0249    |          |                     |          |      |
| Taxifolin                           | XJ4           | 0.1997±0.0118    | 0.001045 | 3.346045            | 1.023777 | up   |
|                                     | FJ            | 0.0126±0.01      |          |                     |          |      |
| (-)-Catechin gallate                | XJ4           | 0.1908±0.0374    | 0.001964 | -2.660136           | 1.017967 | down |
|                                     | FJ            | 0.7614±0.6579    |          |                     |          |      |
| (-)-Epicatechin gallate             | XJ4           | 0.1908±0.0374    | 0.001964 | -2.660136           | 1.017967 | down |
|                                     | FJ            | 0.7614±0.6579    |          |                     |          |      |
| Apigenin 5-O-beta-D-glucopyranoside | XJ4           | 0.1767±0.023     | 0.008613 | 1.994824            | 1.007371 | up   |
|                                     | FJ            | 0.031±0.0194     |          |                     |          |      |
| Homoplantagin                       | XJ4           | 0.1626±0.0044    | 0.000003 | 2.705654            | 1.026101 | up   |
|                                     | FJ            | 0.0158±0.014     |          |                     |          |      |
| Sinapaldehyde                       | XJ4           | 0.1397±0.0097    | 0.001571 | 4.770186            | 1.023798 | up   |
|                                     | FJ            | 0.004±0.0023     |          |                     |          |      |
| Aesculin                            | XJ4           | 0.1234±0.0018    | 0.000000 | 4.356227            | 1.026994 | up   |
|                                     | FJ            | 0.0037±0.0033    |          |                     |          |      |
| Engeletin                           | XJ4           | 0.1202±0.0024    | 0.000001 | 2.122838            | 1.026061 | up   |
|                                     | FJ            | 0.0176±0.0153    |          |                     |          |      |
| Dihydrokaempferol                   | XJ4           | 0.118±0.0023     | 0.000002 | 2.944492            | 1.025962 | up   |
|                                     | FJ            | 0.0095±0.0085    |          |                     |          |      |
| (-)-Epiafzelechin                   | XJ4           | 0.118±0.0106     | 0.004050 | 1.509232            | 1.013899 | up   |
|                                     | FJ            | 0.0283±0.0212    |          |                     |          |      |
| Eriodictyol                         | XJ4           | 0.0893±0.0105    | 0.005523 | 2.418358            | 1.011946 | up   |
|                                     | FJ            | 0.0122±0.0058    |          |                     |          |      |
| Scutellarin                         | XJ4           | 0.058±0.0037     | 0.000309 | 1.612728            | 1.018009 | up   |
|                                     | FJ            | 0.0123±0.0106    |          |                     |          |      |
| Phloretin                           | XJ4           | 0.0544±0.0062    | 0.006562 | 2.217713            | 1.012132 | up   |
|                                     | FJ            | 0.0098±0.0028    |          |                     |          |      |

**Supplementary Table 4. Feed and fat intake across experimental groups**

| Group  | Average Daily Feed Intake (g/day) | Daily Fat Intake (g/day) | Weekly Feed Intake Pattern          |
|--------|-----------------------------------|--------------------------|-------------------------------------|
| NC     | 3.5 ± 0.2 <sup>a</sup>            | 0.18 ± 0.02 <sup>a</sup> | Stable throughout study             |
| MC     | 3.8 ± 0.2 <sup>b</sup>            | 1.33 ± 0.11 <sup>b</sup> | Initially elevated, then stabilized |
| PC     | 3.7 ± 0.3 <sup>ab</sup>           | 1.30 ± 0.13 <sup>b</sup> | Similar to MC group                 |
| L-RAFE | 3.9 ± 0.3 <sup>b</sup>            | 1.37 ± 0.12 <sup>b</sup> | Similar to MC group                 |
| M-RAFE | 3.7 ± 0.2 <sup>ab</sup>           | 1.30 ± 0.10 <sup>b</sup> | Similar to MC group                 |
| H-RAFE | 3.8 ± 0.3 <sup>b</sup>            | 1.33 ± 0.14 <sup>b</sup> | Similar to MC group                 |
| L-WAFE | 4.0 ± 0.3 <sup>b</sup>            | 1.40 ± 0.13 <sup>b</sup> | Similar to MC group                 |
| M-WAFE | 3.8 ± 0.2 <sup>b</sup>            | 1.33 ± 0.11 <sup>b</sup> | Similar to MC group                 |
| H-WAFE | 3.9 ± 0.3 <sup>b</sup>            | 1.37 ± 0.12 <sup>b</sup> | Similar to MC group                 |

Data are expressed as mean ± SEM (n=10). Different superscript letters indicate significant differences between groups ( $p < 0.05$ ). Fat intake was calculated based on diet composition: normal diet (5% fat by weight), high-fat diet (35% fat by weight).

**Supplementary Table 5. Detailed hepatic steatosis assessment**

| Group  | Steatosis Grade         | Macrovesicular (%)       | Microvesicular (%)       |
|--------|-------------------------|--------------------------|--------------------------|
| NC     | 0.2 ± 0.1 <sup>a</sup>  | 5.2 ± 2.1 <sup>a</sup>   | 2.1 ± 1.2 <sup>a</sup>   |
| MC     | 2.8 ± 0.3 <sup>d</sup>  | 68.5 ± 5.3 <sup>d</sup>  | 15.2 ± 3.1 <sup>c</sup>  |
| PC     | 1.3 ± 0.2 <sup>b</sup>  | 28.3 ± 4.2 <sup>b</sup>  | 8.5 ± 2.3 <sup>b</sup>   |
| L-RAFE | 2.1 ± 0.2 <sup>c</sup>  | 45.2 ± 4.8 <sup>c</sup>  | 12.3 ± 2.8 <sup>c</sup>  |
| M-RAFE | 1.2 ± 0.2 <sup>b</sup>  | 25.8 ± 3.9 <sup>b</sup>  | 7.8 ± 2.1 <sup>b</sup>   |
| H-RAFE | 1.5 ± 0.3 <sup>bc</sup> | 32.5 ± 4.5 <sup>bc</sup> | 9.2 ± 2.5 <sup>b</sup>   |
| L-WAFE | 2.3 ± 0.3 <sup>c</sup>  | 52.1 ± 5.1 <sup>c</sup>  | 13.5 ± 3.0 <sup>c</sup>  |
| M-WAFE | 1.8 ± 0.2 <sup>bc</sup> | 38.7 ± 4.6 <sup>bc</sup> | 10.8 ± 2.6 <sup>bc</sup> |
| H-WAFE | 1.9 ± 0.3 <sup>bc</sup> | 41.3 ± 4.9 <sup>c</sup>  | 11.2 ± 2.7 <sup>bc</sup> |

Data are expressed as mean ± SEM (n=10). Different superscript letters indicate significant differences between groups ( $p < 0.05$ ).

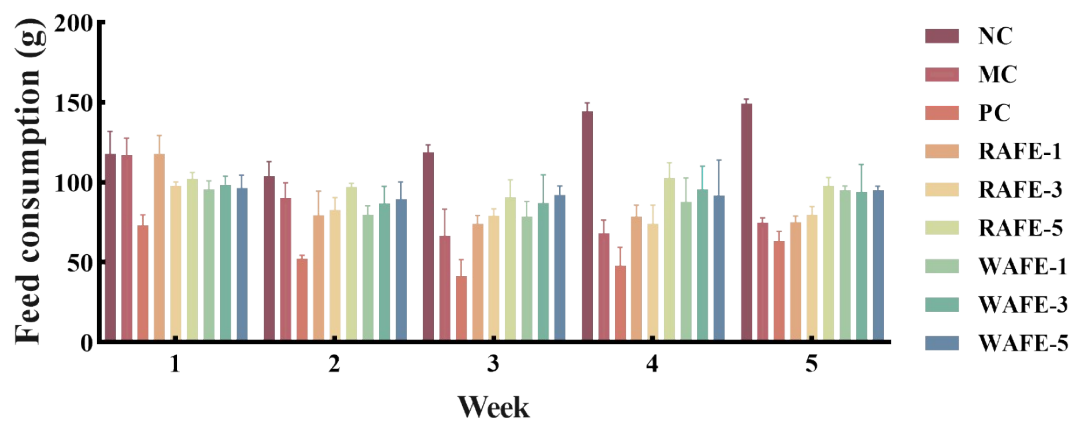

**Supplementary Figure 1. Weekly feed intake of mice in different treatment groups**
